# Supplementary material for: Psychometric Properties of the Perceived Collective Family Efficacy Scale in Algeria
Source: MDPI journal article supplement (doi:10.3390/healthcare11192691), 2023-10-08
Supplement: s1 [file s1]

**Supplementary Table S1.** English version of The Perceived Collective Family Efficacy scale

| No | Items                                                                          | Not at all (1) | Poorly (2) | Moderately (3) | Well (4) | Very well (5) |
|----|--------------------------------------------------------------------------------|----------------|------------|----------------|----------|---------------|
| 1  | Set aside leisure time with your family when other things press for attention. |                |            |                |          |               |
| 2  | Agree to decisions that require some sacrifice of personal interests.          |                |            |                |          |               |
| 3  | Resolve conflicts when family members feel they are not being treated fairly.  |                |            |                |          |               |
| 4  | Prevent family disagreements from turning into heated arguments.               |                |            |                |          |               |
| 5  | Get family members to share household responsibilities.                        |                |            |                |          |               |
| 6  | Support each other in times of stress.                                         |                |            |                |          |               |
| 7  | Help each other to achieve their personal goals.                               |                |            |                |          |               |
| 8  | Help each other with work demands.                                             |                |            |                |          |               |
| 9  | Build respect for each other's particular interests.                           |                |            |                |          |               |
| 10 | Get family members to carry out their responsibilities when they neglect them. |                |            |                |          |               |
| 11 | Build trust in each other.                                                     |                |            |                |          |               |
| 12 | Figure out what choices to make when the family faces important decisions.     |                |            |                |          |               |
| 13 | Find community resources and make good use of them for the family.             |                |            |                |          |               |
| 14 | Get the family to keep close ties to their larger family.                      |                |            |                |          |               |
| 15 | Celebrate family traditions even in difficult times.                           |                |            |                |          |               |
| 16 | Cooperate with schools to improve their educational practices.                 |                |            |                |          |               |
| 17 | Face up to difficulties without excessive tension.                             |                |            |                |          |               |
| 18 | Remain confident during difficult times.                                       |                |            |                |          |               |
| 19 | Accept each member's need for independence.                                    |                |            |                |          |               |
| 20 | Serve as a positive example for the community.                                 |                |            |                |          |               |

**Supplementary Table S2.** Arabic version of The Perceived Collective Family Efficacy scale

|    | من خلال التعامل مع بعضكم البعض داخل الأسرة، إلى أي مدى يتمكن أفراد أسرتك من: | أبدا | نادرا | أحيانا | كثيرا | كثيرا جدا |
|----|------------------------------------------------------------------------------|------|-------|--------|-------|-----------|
| 1  | تخصيص وقت الفراغ للأسرة عندما تكون هناك أشياء أخرى تستدعي الاهتمام           |      |       |        |       |           |
| 2  | الموافقة على القرارات التي تتطلب بعض التضحية بالمصالح الشخصية                |      |       |        |       |           |
| 3  | حل النزاعات عندما يشعر أفراد الأسرة أنهم لا يعاملون بشكل عادل                |      |       |        |       |           |
| 4  | منع الخلافات الأسرية من التحول إلى جدال محتدم                                |      |       |        |       |           |
| 5  | طلب مشاركة المسؤوليات المنزلية من أفراد الأسرة                               |      |       |        |       |           |
| 6  | دعم بعضهم البعض في أوقات التوتر                                              |      |       |        |       |           |
| 7  | مساعدة بعضهم البعض لتحقيق أهدافهم الشخصية                                    |      |       |        |       |           |
| 8  | مساعدة بعضهم البعض في متطلبات العمل                                          |      |       |        |       |           |
| 9  | بناء احترام للمصالح الفردية لبعضهم البعض                                     |      |       |        |       |           |
| 10 | مطالبة أفراد الأسرة بالقيام بمسؤولياتهم عند إهمالهم لها                      |      |       |        |       |           |
| 11 | بناء الثقة لبعضهم البعض                                                      |      |       |        |       |           |
| 12 | تحديد الخيارات التي يجب عليهم اتخاذها عندما تواجه الأسرة قرارات مهمة         |      |       |        |       |           |
| 13 | البحث عن موارد المجتمع واستخدامها بشكل جيد للأسرة                            |      |       |        |       |           |
| 14 | جعل الأسرة تحافظ على علاقات وثيقة مع أسرته الممتدة                           |      |       |        |       |           |
| 15 | الاحتفال بالمناسبات الأسرية حتى في الأوقات الصعبة                            |      |       |        |       |           |
| 16 | التعاون مع المدارس لتحسين الممارسات التعليمية لفرد الأسرة                    |      |       |        |       |           |
| 17 | مواجهة الصعوبات دون اجتهاد مفرط                                              |      |       |        |       |           |
| 18 | المحافظة على الثقة في النفس خلال في الأوقات الصعبة                           |      |       |        |       |           |
| 19 | تقبل حاجة كل عضو للاستقلال                                                   |      |       |        |       |           |
| 20 | العمل على أن يكونوا قدوة إيجابية للمجتمع                                     |      |       |        |       |           |

**Supplementary Table S3.** Back translation version of The Perceived Collective Family Efficacy scale

|    | <b>By dealing with each other in your family, to what extent can your family members:</b> | <b>Never</b> | <b>Rarely</b> | <b>Sometimes</b> | <b>Often</b> | <b>Very often</b> |
|----|-------------------------------------------------------------------------------------------|--------------|---------------|------------------|--------------|-------------------|
| 1  | Allocate free time for the family when there are other things that require attention.     |              |               |                  |              |                   |
| 2  | Agree to decisions that require some sacrifice of personal interests.                     |              |               |                  |              |                   |
| 3  | Resolve conflicts when other people feel like they are not being treated fairly.          |              |               |                  |              |                   |
| 4  | Prevent family disputes from mounting up to a heated conflict.                            |              |               |                  |              |                   |
| 5  | Ask family members to participate in household responsibilities.                          |              |               |                  |              |                   |
| 6  | Support each other in stressful times.                                                    |              |               |                  |              |                   |
| 7  | Help each other with achieving personal goals.                                            |              |               |                  |              |                   |
| 8  | Help each other with work requirements.                                                   |              |               |                  |              |                   |
| 9  | Build respect for each other's personal interests.                                        |              |               |                  |              |                   |
| 10 | Request family members to carry out their responsibilities when they neglect them.        |              |               |                  |              |                   |
| 11 | Build trust in each other.                                                                |              |               |                  |              |                   |
| 12 | Determine choices to be taken when the family faces important decisions.                  |              |               |                  |              |                   |
| 13 | Look up for community resources and use them for the wellbeing of the family.             |              |               |                  |              |                   |
| 14 | Help the family maintain close ties with the extended family.                             |              |               |                  |              |                   |
| 15 | Celebrate family occasions even during hard times.                                        |              |               |                  |              |                   |
| 16 | Cooperate with schools in order to improve learning practices of family members.          |              |               |                  |              |                   |
| 17 | Face difficulties effortlessly.                                                           |              |               |                  |              |                   |
| 18 | Maintain self-confidence even in difficult times.                                         |              |               |                  |              |                   |
| 19 | Accept each member's need for independency.                                               |              |               |                  |              |                   |
| 20 | Work on being a positive role model for the community.                                    |              |               |                  |              |                   |
